# Supplementary material for: Associations of Despair With Suicidality and Substance Misuse Among Young Adults
Source: PubMed Central journal article supplement (PMC7312388; doi:10.1001/jamanetworkopen.2020.8627), 2020-06-23
Supplement: jamanetwopen-3-e208627-s001.pdf [file jamanetwopen-3-e208627-s001.pdf]

## Supplementary Online Content

Copeland WE, Gaydos L, Hill SN, et al. Associations of despair with suicidality and substance misuse among young adults. *JAMA Netw Open*. 2020;3(6):e208627. doi:10.1001/jamanetworkopen.2020.8627

**eTable 1.** Individual Indicators of Cognitive Despair and Their Definitions

**eTable 2.** Definitions of Different Types of Suicidal Thoughts and Behaviors

**eTable 3.** Associations of Lagged Despair Scores With Young Adult (age 25, 30) Outcomes

**eTable 4.** Models Predicting Young Adult Outcomes (ages 25 and 30) Comparing Different Levels of Lagged Despair (0 vs 1, 2, 3)

**eTable 5.** Lagged Longitudinal Models Testing Interactions Between Despair and Each of, Sex, Race/Ethnicity, Poverty, and Educational Attainment in the Prediction of Each Outcome

**eTable 6.** Lagged Models Predicting Young Adult Outcomes Separately by Poverty Status

**eTable 7.** Lagged Models Predicting Young Adult Outcomes Separately by Educational Attainment

**eTable 8.** Lagged Models Predicting Young Adult Outcomes Separately by Race/Ethnicity

**eTable 9.** Lagged Models Predicting Young Adult Outcomes Separately by Sex

**eFigure.** Ascertainment of the Original Great Smoky Mountains Study Sample

This supplementary material has been provided by the authors to give readers additional information about their work.

| <b>eTable 1.</b> Individual Indicators of Cognitive Despair and Their Definitions |                                                                                                                                                          |                                  |
|-----------------------------------------------------------------------------------|----------------------------------------------------------------------------------------------------------------------------------------------------------|----------------------------------|
| Item                                                                              | Definition                                                                                                                                               | Relation to <i>DSM</i> disorders |
| Loneliness                                                                        | Feeling of being alone and/or friendless.                                                                                                                | No disorder                      |
| Hopelessness                                                                      | Bleak, negative, pessimistic view of future and little hope that his/her situation will improve.                                                         | Dysthymic disorder               |
| Helplessness                                                                      | Feels there is little or nothing s/he can do to improve his/her situation                                                                                | No disorder                      |
| Low self-esteem                                                                   | Unjustified feeling of inferiority to others or severe hostility against him/herself.                                                                    | Dysthymic disorder               |
| Frequent worries                                                                  | Painful, unpleasant, or uncomfortable thoughts about future, past behavior, competence, calamities, money, appearance that cannot be stopped voluntarily | Generalized anxiety disorder     |
| Feels sorry for self                                                              | A feeling that life or people have been unfairly unpleasant or troubling.                                                                                | No disorder                      |
| Feels unloved                                                                     | Generalized feeling of being unloved and uncared for.                                                                                                    | Major depressive disorder        |

| <b>eTable 2. Definitions of Different Types of Suicidal Thoughts and Behaviors</b> |                                                                                                                                                                                                                                                                                                                                |
|------------------------------------------------------------------------------------|--------------------------------------------------------------------------------------------------------------------------------------------------------------------------------------------------------------------------------------------------------------------------------------------------------------------------------|
| Construct                                                                          | Definition                                                                                                                                                                                                                                                                                                                     |
| Passive ideation                                                                   | Thoughts about wanting to be dead or death. Include thoughts about not being able to go on any longer and life not being worth living. To code, thoughts must be intrusive into at least two activities.                                                                                                                       |
| Active ideation                                                                    | Thoughts specifically about killing oneself, by whatever means, with some intention to carry them out. Do not include suicidal plans                                                                                                                                                                                           |
| Suicidal Plans                                                                     | Suicidal thoughts that contain plans of a suicidal act and some intent to carry them out. If suicidal attempt has been made, determine whether a plan was present prior to the attempt.                                                                                                                                        |
| Suicide Attempt                                                                    | Episodes of deliberately self-harmful behavior involving some intention to die at the time of the attempt. Rate here, no matter how unlikely the attempt was to cause death, so long as the child's intention was to die. If parent unsure about intention to die, code if the parent can describe a clear self-harmful event. |

| <b>eTable 3. Associations of Lagged Despair Scores With Young Adult (age 25, 30) Outcomes</b> |             |                |            |           |           |                  |
|-----------------------------------------------------------------------------------------------|-------------|----------------|------------|-----------|-----------|------------------|
|                                                                                               |             | Despair scores |            |           |           |                  |
|                                                                                               | Total       | 0              | 1          | 2         | 3+        | P Value          |
|                                                                                               | n (%)       | n (%)          | n (%)      | n (%)     | n (%)     |                  |
| <b>Total</b>                                                                                  | 2424 (100)  | 1937 (80.5)    | 275 (12.0) | 94 (4.1)  | 107 (3.5) |                  |
| <b>Suicide</b>                                                                                |             |                |            |           |           |                  |
| Yes                                                                                           | 160 (5.9)   | 102 (4.2)      | 23 (9.7)   | 16 (15.3) | 19 (24.1) | --               |
| No                                                                                            | 2253 (94.1) | 1907 (95.8)    | 247 (90.3) | 57 (84.7) | 42 (75.9) | <b>0.001</b>     |
| <b>Alcohol disorder</b>                                                                       |             |                |            |           |           |                  |
| Yes                                                                                           | 132 (7.6)   | 109 (7.5)      | 11 (5.8)   | 7 (3.9)   | 5 (3.6)   | --               |
| No                                                                                            | 2292 (92.4) | 1910 (92.5)    | 260 (94.2) | 66 (96.1) | 56 (96.4) | 0.13             |
| <b>Illicit drug use</b>                                                                       |             |                |            |           |           |                  |
| Yes                                                                                           | 137(4.7)    | 102 (3.8)      | 17 (3.7)   | 6 (9.6)   | 12 (27.1) | --               |
| No                                                                                            | 2247 (95.3) | 1885 (96.2)    | 248 (96.3) | 66 (90.4) | 48 (72.9) | <b>&lt;0.001</b> |
| <b>Illicit drug disorder</b>                                                                  |             |                |            |           |           |                  |
| Yes                                                                                           | 88 (2.9)    | 68 (2.6)       | 10 (1.5)   | 4 (2.7)   | 6 (9.9)   | --               |
| No                                                                                            | 2336 (97.1) | 1951 (97.4)    | 261 (98.5) | 69 (97.3) | 55 (90.1) | <b>0.68</b>      |
| <b>Opioid Use</b>                                                                             |             |                |            |           |           |                  |
| Yes                                                                                           | 55 (2.2)    | 41 (1.7)       | 6 (1.0)    | 2 (6.8)   | 6 (16.5)  | --               |
| No                                                                                            | 2328 (97.8) | 1945 (98.3)    | 259 (98.9) | 70 (93.2) | 54 (83.5) | <b>0.002</b>     |

Table is based upon 2424 observations of N=1266 individuals. All percentages are weighted and n is unweighted. Despair score is treated as a count variable. Covariates included sex, race/ethnicity, educational status, and poverty. Bolded values are significant at  $p < 0.05$ .

| <b>eTable 4. Models Predicting Young Adult Outcomes (ages 25 and 30) Comparing Different Levels of Lagged Despair (0 vs 1, 2, 3)</b> |            |            |                |            |                 |            |                 |
|--------------------------------------------------------------------------------------------------------------------------------------|------------|------------|----------------|------------|-----------------|------------|-----------------|
|                                                                                                                                      |            | 0 vs 1     |                | 0 vs. 2    |                 | 0 vs. 3    |                 |
| Outcome                                                                                                                              | Predictors | OR         | 95% CI         | OR         | 95% CI          | OR         | 95% CI          |
| Suicidality                                                                                                                          | Despair    | <b>1.7</b> | <b>0.8-3.8</b> | <b>1.6</b> | <b>0.3-7.3</b>  | <b>3.4</b> | <b>1.2-9.9</b>  |
| Illicit drug use                                                                                                                     | Despair    | <b>0.9</b> | <b>0.3-2.3</b> | <b>3.0</b> | <b>0.7-12.2</b> | <b>5.6</b> | <b>1.7-18.5</b> |
| Opioid Use                                                                                                                           | Despair    | <b>0.7</b> | <b>0.2-2.1</b> | <b>4.3</b> | <b>0.9-21.2</b> | <b>7.2</b> | <b>1.5-35.6</b> |

Table is based on 2424 observations of 1266 individuals. Covariates included sex, race/ethnicity, educational status, poverty. Bolded values are significant at  $p < 0.05$ . OR= odds ratio; CI = 95% confidence intervals.

**eTable 5.** Lagged Longitudinal Models Testing Interactions Between Despair and Each of, Sex, Race/Ethnicity, Poverty, and Educational Attainment in the Prediction of Each Outcome

|                       | Sex            | Race/ethnicity | Poverty        | Educational Attainment |
|-----------------------|----------------|----------------|----------------|------------------------|
|                       | <i>P</i> Value | <i>P</i> Value | <i>P</i> Value | <i>P</i> Value         |
| Outcome               |                |                |                |                        |
| Suicide               | <b>0.03</b>    | 0.53           | <b>0.01</b>    | 0.44                   |
| Alcohol disorder      | 0.75           | 0.11           | 0.84           | 0.08                   |
| Illicit drug use      | 0.08           | <b>0.03</b>    | 0.71           | 0.07                   |
| Illicit drug disorder | 0.99           | 0.36           | 0.90           | <b>0.008</b>           |
| Opioid Use            | 0.09           | 0.55           | 0.62           | 0.13                   |

Bolded values are significant at  $p < 0.05$ .

| <b>eTable 6. Lagged Models Predicting Young Adult Outcomes Separately by Poverty Status</b> |              |         |      |                  |         |      |
|---------------------------------------------------------------------------------------------|--------------|---------|------|------------------|---------|------|
|                                                                                             | Impoverished |         |      | Not impoverished |         |      |
| Outcome                                                                                     | OR           | 95% CI  | p    |                  |         |      |
| Suicide                                                                                     | 2.2          | 1.3-3.5 | 0.78 | 0.8              | 0.5-1.3 | 0.41 |
| Alcohol disorder                                                                            | 0.7          | 0.4-1.3 | 0.28 | 0.8              | 0.5-1.4 | 0.51 |
| Illicit drug use                                                                            | 1.7          | 1.0-3.0 | 0.06 | 1.7              | 0.9-3.2 | 0.14 |
| Illicit drug disorder                                                                       | 0.8          | 0.4-1.6 | 0.52 | 1.3              | 0.8-2.0 | 0.31 |

Poverty status was defined based upon Federal definitions incorporating household size and income.

| <b>eTable 7. Lagged Models Predicting Young Adult Outcomes Separately by Educational Attainment</b> |                |         |      |                   |                |                  |
|-----------------------------------------------------------------------------------------------------|----------------|---------|------|-------------------|----------------|------------------|
|                                                                                                     | Low attainment |         |      | Higher attainment |                |                  |
| Outcome                                                                                             | OR             | 95% CI  | p    |                   |                |                  |
| Suicide                                                                                             | 1.5            | 0.6-3.9 | 0.38 | <b>1.6</b>        | <b>1.0-2.4</b> | <b>0.03</b>      |
| Alcohol disorder                                                                                    | 0.5            | 0.3-1.1 | 0.07 | 1.1               | 0.7-1.7        | 0.85             |
| Illicit drug use                                                                                    | 1.2            | 0.6-2.3 | 0.65 | <b>2.6</b>        | <b>1.7-4.2</b> | <b>&lt;0.001</b> |
| Illicit drug disorder                                                                               | 0.6            | 0.2-1.6 | 0.30 | <b>1.9</b>        | <b>1.3-2.8</b> | <b>&lt;0.001</b> |

High educational attainment was defined as finishing at least some college; low attainment was defined failing to complete high school or obtaining a high school degree only.



| <b>eTable 8. Lagged Models Predicting Young Adult Outcomes Separately by Race/Ethnicity</b> |            |                |             |                 |         |      |
|---------------------------------------------------------------------------------------------|------------|----------------|-------------|-----------------|---------|------|
|                                                                                             | White      |                |             | Native American |         |      |
| Outcome                                                                                     | OR         | 95% CI         | p           |                 |         |      |
| Suicide                                                                                     | 1.3        | 0.9-1.9        | 0.12        | --              | --      | --   |
| Alcohol disorder                                                                            | 0.8        | 0.5-1.2        | 0.25        | 1.6             | 0.9-2.9 | 0.10 |
| Illicit drug use                                                                            | <b>1.6</b> | <b>1.1-2.4</b> | <b>0.02</b> | 0.7             | 0.4-1.5 | 0.38 |
| Illicit drug disorder                                                                       | 1.1        | 0.6-1.9        | 0.87        | 0.8             | 0.5-1.3 | 0.81 |

Only the comparison between white participants and Native American participants was tested. This table excluded African Americans (n=79) as that group is too small for stand-alone comparisons.

| <b>eTable 9. Lagged Models Predicting Young Adult Outcomes Separately by Sex</b> |            |                |                  |        |         |      |
|----------------------------------------------------------------------------------|------------|----------------|------------------|--------|---------|------|
|                                                                                  | Male       |                |                  | Female |         |      |
| Outcome                                                                          | OR         | 95% CI         | p                |        |         |      |
| Suicide                                                                          | <b>2.3</b> | <b>1.4-3.8</b> | <b>&lt;0.001</b> | 1.1    | 0.7-1.5 | 0.79 |
| Alcohol disorder                                                                 | 0.7        | 0.5-1.2        | 0.22             | 0.7    | 0.3-1.5 | 0.30 |
| Illicit drug use                                                                 | <b>2.2</b> | <b>1.4-3.3</b> | <b>&lt;0.001</b> | 1.2    | 0.7-2.1 | 0.53 |
| Illicit drug disorder                                                            | 1.1        | 0.5-2.7        | 0.81             | 1.0    | 0.5-1.9 | 0.95 |

**eFigure.** Ascertainment of the Original Great Smoky Mountains Study Sample

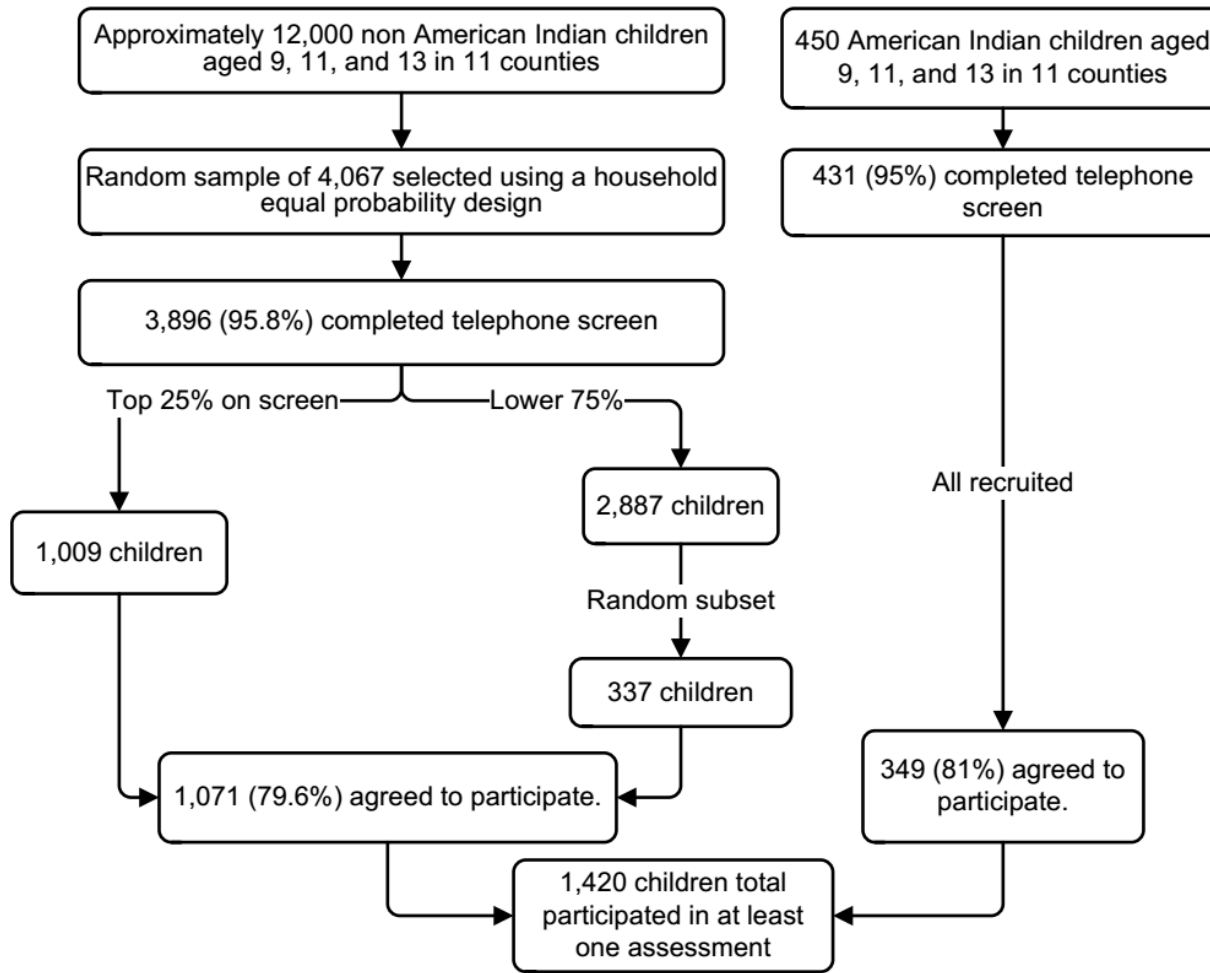

Telephone screen assessed for psychopathology risk.
